# Supplementary material
Source: Elsevier journal article supplement (https://www.sciencedirect.com/science/article/pii/S2341287915002240)
Supplement: mmc1 [file S2341287915002240:mmc1.docx]

**Table S1. Selected publications in the systematic review and critical reading of literature.**

| **Clinical Trials** |  |
| --- | --- |
| Arms of treatment | Referencia |
| IMIQUIMOD CREAM | Jiang C, Hu X, Ma G, Chen D, Jin Y, Chen H, Chen X, Lin X. A prospective self-controlled phase II study of imiquimod 5% cream in the treatment of infantile hemangioma. Pediatr Dermatol. 2011;28:259-66. |
| TIMOLOL CREAM | Chan H, McKay C, Adams S, Wargon O. RCT of timolol maleate gel for superficial infantile hemangiomas in 5- to 24-week-olds. Pediatrics. 2013 ;131:e1739-47. |
|  | Yu L, Li S, Su B, Liu Z, Fang J, Zhu L, Huang M, Shan W, Song D, Ye B, Luo C. Treatment of superficial infantile hemangiomas with timolol: Evaluation of short-term efficacy and safety in infants. Exp Ther Med. 2013;6:388-390. |
| PROPANONOL SOLUTION | Hogeling M, Adams S, Wargon O. A randomized controlled trial of propranolol for infantile hemangiomas. Pediatrics. 2011;128:e259-66. |
|  | Léauté-Labrèze C, Dumas de la Roque E, Nacka F, Abouelfath A, Grenier N, Rebola M, Ezzedine K, Moore N. Double-blind randomized pilot trial evaluating the efficacy of oral propranolol on infantile haemangiomas in infants < 4 months of age. Br J Dermatol. 2013;169:181-3. |
| TOPICAL CORTICOSTEROIDS vs. INTRALESIONAL CORTICOSTEROIDS | Pandey A, Gangopadhyay AN, Sharma SP, Kumar V, Gupta DK, Gopal SC. Evaluation of topical steroids in the treatment of superficial hemangioma. Skinmed. 2010;8:9-11. |
| ATENOLOL vs. PROPANONOL | Ábarzúa-Araya A, Navarrete-Dechent CP, Heusser F, Retamal J, Zegpi-Trueba MS.  Atenolol versus propranolol for the treatment of infantile hemangiomas: a randomized controlled study. J Am Acad Dermatol. 2014;70:1045-9. |
| PROPANONOL vs. PREDNISOLONE | Malik MA, Menon P, Rao KL, Samujh R. Effect of propranolol vs prednisolone vs propranolol with prednisolone in the management of infantile hemangioma: a randomized controlled study. J Pediatr Surg. 2013;48:2453-9. |
|  | Bauman NM, McCarter RJ, Guzzetta PC, Shin JJ, Oh AK, Preciado DA, He J, Greene  EA, Puttgen KB. Propranolol vs prednisolone for symptomatic proliferating infantile hemangiomas: a randomized clinical trial. JAMA Otolaryngol Head Neck Surg. 2014;140:323-30. |
| PROPANONOL vs. LASER | Kagami S, Kuwano Y, Shibata S, Uwajima Y, Yamada D, Miyamoto A, Miyagawa T, Araki M, Takahashi K, Isomura S, Aozasa N, Masui Y, Yamamoto M, Inuzuka R, Katori T, Sato S. Propranolol is more effective than pulsed dye laser and cryosurgery for infantile hemangiomas. Eur J Pediatr. 2013;172:1521-6. |
| LASER AND IMIQUIMOD | Tremaine AM, Armstrong J, Huang YC, Elkeeb L, Ortiz A, Harris R, Choi B, Kelly KM. Enhanced port-wine stain lightening achieved with combined treatment of selective photothermolysis and imiquimod. J Am Acad Dermatol. 2012;66:634-41. |
| LASER AND INDOCYANINE | Klein A, Szeimies RM, Bäumler W, Zeman F, Schreml S, Hohenleutner U, Landthaler M, Koller M, Babilas P. Indocyanine green-augmented diode laser treatment of port-wine stains: clinical and histological evidence for a new treatment option from a randomized controlled trial. Br J Dermatol. 2012;167:333-42. |
| LASER AND PHOTODYNAMICS | Gao K, Huang Z, Yuan KH, Zhang B, Hu ZQ. Side-by-side comparison of photodynamic therapy and pulsed-dye laser treatment of port-wine stain birthmarks. Br J Dermatol. 2013;168:1040-6. |
| LASER vs. CRYOTHERAPY vs. OBSERVATION | Maier H., Wanka A., Schmalwieser A.W., Maier B., Dani T., Neumann R., et al. Prospective, randomized, investigator‐blind, controlled therapy study on treatment of haemangioma of infancy: Pulsed dye laser versus cryotherapy versus observation. Exp Dermatol. 2012;21:e15. |
|  | Kessels JP, Hamers ET, Ostertag JU. Superficial hemangioma: pulsed dye laser versus wait-and-see. Dermatol Surg. 2013;39:414-21. |
| TWO TYPES OF LASER (KTP & Nd: YAG) | Pancar GS, Aydin F, Senturk N, Bek Y, Canturk MT, Turanli AY. Comparison of the 532-nm KTP and 1064-nm Nd:YAG lasers for the treatment of cherry angiomas. J Cosmet Laser Ther. 2011;13:138-41. |
| **Reviews and Evidence Reports** | |
| 38th Annual Meeting of the Society for Pediatric Dermatology. Pediatr Dermatol [Internet]. 2012;29. (http://www.embase.com/search/results?subaction=viewrecord&from=export&id=L70892402) | |
| Peridis S, Pilgrim G, Athanasopoulos I, Parpounas K. A meta-analysis on the effectiveness of propranolol for the treatment of infantile airway haemangiomas. Int J Pediatr Otorhinolaryngol. 2011;75:455-60. | |
| Xu SQ, Jia RB, Zhang W, Zhu H, Ge SF, Fan XQ. Beta-blockers versus corticosteroids in the treatment of infantile hemangioma: an evidence-based systematic review. World J Pediatr. 2013;9:221-9. | |
| Bajaj Y, Kapoor K, Ifeacho S, Jephson CG, Albert DM, Harper JI, Hartley BE. Great Ormond Street Hospital treatment guidelines for use of propranolol in infantile isolated subglottic haemangioma. J Laryngol Otol. 2013;127:295-8. | |
| Cohen-Barak E, Rozenman D, Shani Adir A. Infantile haemangiomas and quality of life. Arch Dis Child. 2013;98:676-9. | |
| Marqueling AL, Oza V, Frieden IJ, Puttgen KB. Propranolol and infantile hemangiomas four years later: a systematic review. Pediatr Dermatol. 2013;30:182-91. | |
| Dalby TK, Lester-Smith D. Propranolol for the treatment of infantile haemangioma. J Paediatr Child Health. 2013;49:148-51. | |
| Sánchez-Carpintero I, Ruiz-Rodriguez R, López-Gutiérrez JC. [Propranolol in the treatment of infantile hemangioma: clinical effectiveness, risks, and recommendations]. Actas Dermosifiliogr. 2011;102:766-79. | |
| Fette A. Propranolol in use for treatment of complex infant hemangiomas: literature review regarding current guidelines for preassessment and standards of care before initiation of therapy. ScientificWorldJournal. 2013:20;2013:850193. | |
| Izadpanah A, Izadpanah A, Kanevsky J, Belzile E, Schwarz K. Propranolol versus corticosteroids in the treatment of infantile hemangioma: a systematic review and meta-analysis. Plast Reconstr Surg. 2013;13:601-13. | |
| Menezes MD, McCarter R, Greene EA, Bauman NM. Status of propranolol for treatment of infantile hemangioma and description of a randomized clinical trial. Ann Otol Rhinol Laryngol. 2011;120:686-95. | |
| Spiteri Cornish K, Reddy AR. The use of propranolol in the management of periocular capillary haemangioma-a systematic review. Eye (Lond). 2011;25:1277-83. | |
